# Supplementary material for: Laurel Attenuates Dexamethasone-Induced Skeletal Muscle Atrophy In Vitro and in a Rat Model
Source: MDPI journal article supplement (doi:10.3390/nu14102029), 2022-05-12
Supplement: s1 [file s1]

**Table S1.** Composition of experimental diets

| Ingredient (% w/w)      | AIN-93G | 2% laurel-containing diet |
|-------------------------|---------|---------------------------|
| Casein                  | 20.00   | 20.00                     |
| L-cystine               | 0.30    | 0.30                      |
| $\beta$ -corn starch    | 39.75   | 37.75                     |
| $\alpha$ -Corn starch   | 13.2    | 13.20                     |
| Sucrose                 | 10.25   | 10.25                     |
| Soybean oil             | 7.00    | 7.00                      |
| Cellulose               | 5.00    | 5.00                      |
| AIN-93G Mineral mixture | 3.50    | 3.50                      |
| AIN-93G Vitamin mixture | 1.00    | 1.00                      |
| Laurel power            | 0.00    | 2.00                      |

**Table S2.** Primers sequences used in real-time PCR analysis. F: Forward; R: Reverse.

| mRNA  | Species | Direction | Sequence (5' - 3')      |
|-------|---------|-----------|-------------------------|
| Mafbx | Rat     | F         | TTGTGCGATGTTACCCAAGAA   |
|       |         | R         | GGTGAAAGTGAGACGGAGCA    |
| Murf1 | Rat     | F         | GAGGAGGAGGAGGAGGATCAA   |
|       |         | R         | CAAGGAGCCCTAACCCCATC    |
| Bnip3 | Rat     | F         | CAGAGCGGGGAGGAGAAC      |
|       |         | R         | GAAGCTGGAACGCTGCTC      |
| Foxo1 | Rat     | F         | CACACAGCTGGGTGTCAGGCTA  |
|       |         | R         | GGGGTGAAGGGCATCTTT      |
| Kif15 | Rat     | F         | CTGCAGCAAGATGTACACCAA   |
|       |         | R         | TCATCTGAGCGTGAAAACCTC   |
| Lc3   | Rat     | F         | CATGAGCGAGTTGGTCAAGA    |
|       |         | R         | CCATGCTGTGCTGGTTCA      |
| Redd1 | Rat     | F         | CCAGAGAAGAGGGCCTTGA     |
|       |         | R         | CCATCCAGGTATGAGGAGTCTT  |
| Foxo3 | Rat     | F         | TTCAAGGATAAGGGCGACAG    |
|       |         | R         | GGCTGTGCAGTGACAGGTT     |
| Ppia  | Rat     | F         | CAAATGCTGGACCAAACACAA   |
|       |         | R         | TCACCTTCCCAAAGACCACA    |
| Mafbx | Mouse   | F         | GCTGGTGGGCAACATTAACA    |
|       |         | R         | GTTGTAAGCACACAGGCAGGTC  |
| Murf1 | Mouse   | F         | CTGAGTAACTGCATCTCCATGCT |
|       |         | R         | TCCTTCACCTGGTGGCTATTC   |
| Ppia  | Mouse   | F         | GCAAATGCTGGACCAAACAC    |
|       |         | R         | TCACCTTCCCAAAGACCACAT   |

Mafbx, muscle atrophy F-box; Murf1, Muscle RING finger 1; Bnip3, Bcl-2/E1B-19 kDa interacting protein 3; Foxo, Forkhead box class O; Kif15, Kinesin family member 15; Lc3, Light chain 3; Redd1, Regulated in DNA damage and development 1.
